# Supplementary material for: Tuberculin skin test and Interferon-gamma release assay agreement, and associated factors with latent tuberculosis infection, in medical and nursing students in Bandung, Indonesia
Source: PubMed Central journal article supplement (PMC10947906; doi:10.1371/journal.pone.0299874), 2024-03-18
Supplement: pone.0299874.s002.pdf [file pone.0299874.s002.pdf]

## DATA COLLECTION FORM AT BASELINE

|                            |                                                                                          |                                                                                                                                                                                                                           |
|----------------------------|------------------------------------------------------------------------------------------|---------------------------------------------------------------------------------------------------------------------------------------------------------------------------------------------------------------------------|
| 1                          | Date of interview                                                                        | _ _ / _ _ / _ _ <br>Day/Month/Year                                                                                                                                                                                        |
| 2                          | Interviewer initials                                                                     | _ _                                                                                                                                                                                                                       |
| 3                          | Start time of interview                                                                  | _ _ : _ _                                                                                                                                                                                                                 |
| <b>DEMOGRAPHIC DETAILS</b> |                                                                                          |                                                                                                                                                                                                                           |
| 4                          | Participant number                                                                       | <b>PARTICIPANT STICKER</b>                                                                                                                                                                                                |
| 5                          | Date of birth                                                                            | _ _ / _ _ / _ _ <br>Day/Month/Year                                                                                                                                                                                        |
| 6                          | Age                                                                                      | _ _  Years                                                                                                                                                                                                                |
| 7                          | Gender                                                                                   | _ <br>1 = Male, 0 = Female                                                                                                                                                                                                |
| 8                          | Student type                                                                             | _ <br>1 = Medical, 2 = Nursing                                                                                                                                                                                            |
| 9                          | Month and year of entry into internship program                                          | _ _ / _ _ <br>Month/Year                                                                                                                                                                                                  |
| 10                         | Where do you stay                                                                        | _ <br>1 = Family housing, 2 = Student housing                                                                                                                                                                             |
| 11                         | Ethnicity                                                                                | _ <br>1 = Sundanese, 2 = Javanese, 3 = Batak, 4 = Betawi, 5 = Madurese, 6 = Minangkabau, 7 = Acehnese, 8 = Balinese, 9 = Chinese, 10 = Other (please state)<br>_____                                                      |
| <b>MEDICAL HISTORY</b>     |                                                                                          |                                                                                                                                                                                                                           |
| 12                         | BCG vaccination                                                                          | _ <br>1 = Vaccinated, 0 = Not vaccinated,                                                                                                                                                                                 |
| 13                         | Do you have a BCG scar? (can I please see it?)                                           | _ <br>1 = Yes, 0 = No                                                                                                                                                                                                     |
| 14                         | Have you ever been diagnosed with HIV?                                                   | _ <br>1 = Yes, 0 = No                                                                                                                                                                                                     |
| 15                         | Do you have any other immunocompromised condition? (read the options to the participant) | _ <br>1 = Diabetes, 2 = Systemic Lupus Erythematosus, 3 = Renal failure, 4 = Transplant anti-rejection therapy, 5 = TNF $\alpha$ inhibitor therapy, 6 = Other immune-suppressive condition or therapy (steroid), 7 = None |
| 16                         | Do you smoke cigarettes? (read the options to the participant)                           | _ <br>1 = Yes current , 2 = Ex-Smoker, 3 = Never                                                                                                                                                                          |
| 17                         | If current or ex-smoker                                                                  | Age started:  _  years                                                                                                                                                                                                    |

INTERACT STUDY

|                            |                                                                                                    |                                                                                                                |
|----------------------------|----------------------------------------------------------------------------------------------------|----------------------------------------------------------------------------------------------------------------|
|                            |                                                                                                    | Packs/day:  __                                                                                                 |
| 18                         | If ex-smoker                                                                                       | Age stopped:  __  years                                                                                        |
| 19                         | Do you consume alcohol?                                                                            | __ <br>1 = Yes, 0 = No                                                                                         |
| <b>TB EXPOSURE</b>         |                                                                                                    |                                                                                                                |
| 20                         | Have you ever been involved in other training/project in hospital/clinic prior to study enrolment? | __ <br>1 = Yes, 0 = No                                                                                         |
| 21                         | If yes, any direct contact with TB patient or participation in sputum collection or examination?   | __ <br>1 = Yes, 0 = No                                                                                         |
| 22                         | If yes, state the location                                                                         | __ <br>1 = DOTS clinic, 2 = Isolation ward, 3 = Laboratory, 4 = Pulmonary ward, 5 = Other (please state) _____ |
| 23                         | When?                                                                                              | __ _ __  Months ago<br> __ _ __  Years ago                                                                     |
| 24                         | Have you ever had direct contact with family or friends who have been diagnosed with TB?           | __ <br>1 = Yes, 0 = No                                                                                         |
| 25                         | If yes, how many years/months ago?                                                                 | __ _ __  Months ago<br> __ _ __  Years ago                                                                     |
| <b>ACTIVE TB SCREENING</b> |                                                                                                    |                                                                                                                |
| 26                         | Dry cough                                                                                          | __  1 = Yes, 0 = No<br>Duration:  __ _ __  days or  __ _ __  weeks                                             |
| 27                         | Productive cough                                                                                   | __  1 = Yes, 0 = No<br>Duration:  __ _ __  days or  __ _ __  weeks                                             |
| 28                         | Cough at night                                                                                     | __  1 = Yes, 0 = No<br>Duration:  __ _ __  days or  __ _ __  weeks                                             |
| 29                         | Pain in the chest                                                                                  | __  1 = Yes, 0 = No<br>Duration:  __ _ __  days or  __ _ __  weeks                                             |
| 30                         | Coughing up blood or sputum                                                                        | __  1 = Yes, 0 = No<br>Duration:  __ _ __  days or  __ _ __  weeks                                             |
| 31                         | Night sweats                                                                                       | __  1 = Yes, 0 = No<br>Duration:  __ _ __  days or  __ _ __  weeks                                             |
| 32                         | Weakness or fatigue                                                                                | __  1 = Yes, 0 = No<br>Duration:  __ _ __  days or  __ _ __  weeks                                             |
| 33                         | Weight loss                                                                                        | __  1 = Yes, 0 = No<br>Duration:  __ _ __  days or  __ _ __  weeks                                             |
| 34                         | No appetite                                                                                        | __  1 = Yes, 0 = No<br>Duration:  __ _ __  days or  __ _ __  weeks                                             |
| 35                         | Fever                                                                                              | __  1 = Yes, 0 = No<br>Duration:  __ _ __  days or  __ _ __  weeks                                             |
| 36                         | Visible Mass in Neck                                                                               | __  1 = Yes, 0 = No                                                                                            |

INTERACT STUDY

|                             |                                |                                                    |
|-----------------------------|--------------------------------|----------------------------------------------------|
|                             |                                | Duration:  _ _  days or  _ _  weeks                |
| 37                          | End time of interview          | _ _ : _ _                                          |
| <b>BODY MASS INDEX</b>      |                                |                                                    |
| 38                          | Height                         | _ _ _  cm                                          |
| 39                          | Weight                         | _ _ _ .  _ _  kg                                   |
| <b>IGRA TEST</b>            |                                |                                                    |
| 40                          | Date of blood drawing for IGRA | _ _ / _ _ / _ _ <br>Day/Month/Year                 |
| 41                          | IGRA test result qualitative   | _ <br>1 = Positive, 0 = Negative, 2 = Intermediate |
| <b>TUBERCULIN SKIN TEST</b> |                                |                                                    |
| 42                          | Date of TST administered       | _ _ / _ _ / _ _ <br>Day/Month/Year                 |
| 43                          | Date of TST read               | _ _ / _ _ / _ _ <br>Day/Month/Year                 |
| 44                          | TST Result (diameter)          | _ _  mm                                            |
| 45                          | TST Result                     | _ <br>1 = Positive, 0 = Negative                   |
